# Supplementary figures and images for: Lithium–nitrogen and lithium–boron–nitrogencage compounds formed using the phenylhydrazido backbone
Source: Royal Society of Chemistry journal article supplement (doi:10.1039/b510103d), 2005-11-23

Fig. 1

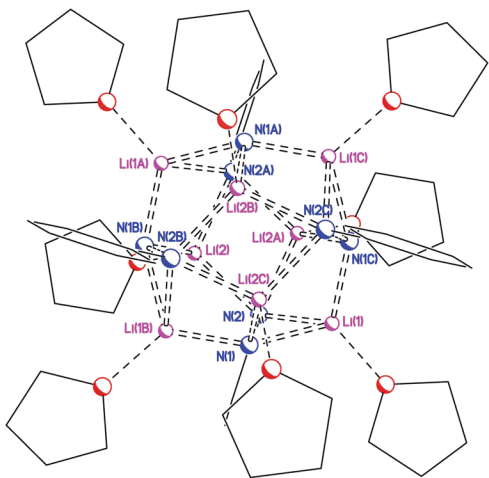

Fig. 2

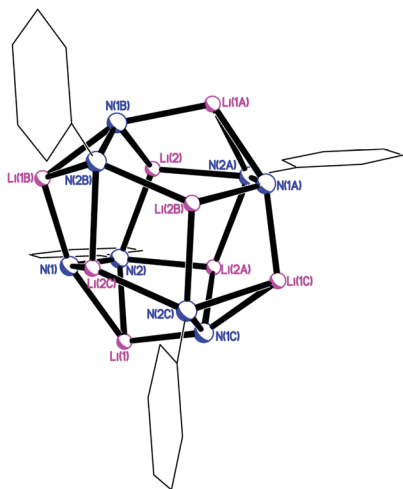

Fig. 3

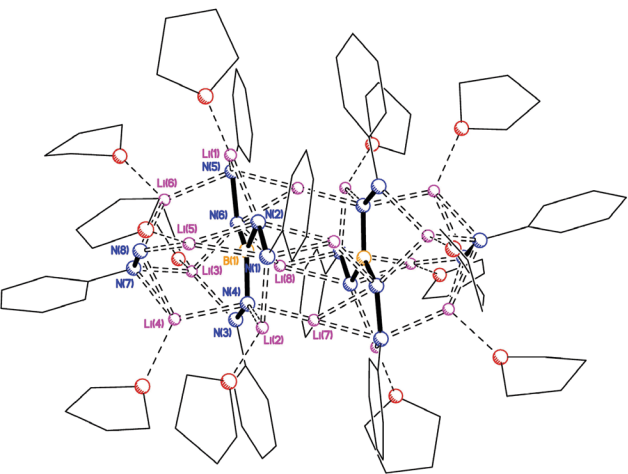

Fig. 4

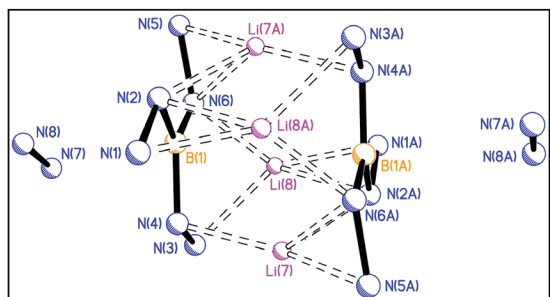

c

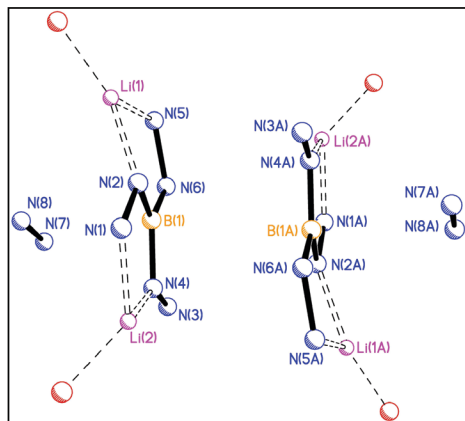

b

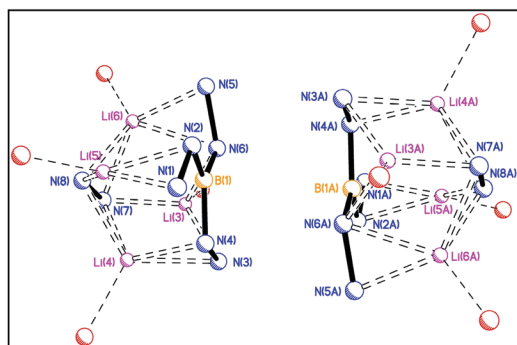

a

Supplement: b510103d.pdf [file b510103d.pdf]
